# Supplementary material
Source: HighWire-hosted journal article supplement (https://bmjopen.bmj.com/content/11/9/e048956)
Supplement: inline-supplementary-material-3 [file inline-supplementary-material-3.pdf]

Supplementary File 3 - Data extraction tables for stage 2

Table 1 - PROM Characteristics

| PROM | Year of development | Construct | Target population | Mode of administration | Recall period | Subscales (number of items) | Response options | Range of scores | Original language | Available translations | No. of evaluation studies |
|------|---------------------|-----------|-------------------|------------------------|---------------|-----------------------------|------------------|-----------------|-------------------|------------------------|---------------------------|
|      |                     |           |                   |                        |               |                             |                  |                 |                   |                        |                           |
|      |                     |           |                   |                        |               |                             |                  |                 |                   |                        |                           |

Table 2 – Study population characteristics by measurement property

|            |     | Measurement property (e.g. content validity/structural validity/internal consistency) | Population |                       |        | Disease characteristics     |                  |                       |                                                                      | Instrument administration |          |               |
|------------|-----|---------------------------------------------------------------------------------------|------------|-----------------------|--------|-----------------------------|------------------|-----------------------|----------------------------------------------------------------------|---------------------------|----------|---------------|
| PROM       | Ref |                                                                                       | n          | Age (mean, SD, range) | Gender | Fraction of cohort with EOS | Aetiology of EOS | Curve characteristics | Treatment modality breakdown (%surgery/bracing/casting/conservative) | Country                   | Language | Response rate |
| e.g. SRS22 |     | e.g. Content validity                                                                 |            |                       |        |                             |                  |                       |                                                                      |                           |          |               |
| e.g. SRS22 |     | e.g. Reliability                                                                      |            |                       |        |                             |                  |                       |                                                                      |                           |          |               |

Table 3 - PROM Measurement properties 1 (each study of a PROM will be listed on a separate row)

| PROM                                      | Country | Structural validity |                 |                 | Internal consistency |                 |                               | Cross-cultural validity/measurement invariance |                 |                 | Reliability |                 |                     |
|-------------------------------------------|---------|---------------------|-----------------|-----------------|----------------------|-----------------|-------------------------------|------------------------------------------------|-----------------|-----------------|-------------|-----------------|---------------------|
|                                           |         | N (sample size)     | Method. quality | Result (rating) | n                    | Method. quality | Result (rating) (+/-/?)       | n                                              | Method. quality | Result (rating) | n           | Method. quality | Result (rating)     |
|                                           |         |                     |                 |                 | 102                  | Adequate        | e.g. Cronbach alph.= 0.91 (+) |                                                |                 |                 | 68          | Very Good       | e.g. ICC = 0.84 (+) |
|                                           |         |                     |                 |                 |                      |                 |                               |                                                |                 |                 |             |                 |                     |
| Pooled or summary result (overall rating) |         |                     |                 |                 |                      |                 |                               |                                                |                 |                 |             |                 |                     |

Table 3 cont. – PROM Measurement properties 2

| PROM | Country | Measurement error |                 |                 | Criterion validity |                 |                 | Hypotheses testing |                 |                 | Responsiveness |                 |                 |
|------|---------|-------------------|-----------------|-----------------|--------------------|-----------------|-----------------|--------------------|-----------------|-----------------|----------------|-----------------|-----------------|
|      |         | n                 | Method. quality | Result (rating) | n                  | Method. quality | Result (rating) | n                  | Method. quality | Result (rating) | n              | Method. quality | Result (rating) |
|      |         |                   |                 |                 |                    |                 |                 |                    |                 |                 |                |                 |                 |
|      |         |                   |                 |                 |                    |                 |                 |                    |                 |                 |                |                 |                 |

|                                           |  |  |  |  |  |  |  |  |  |  |  |  |
|-------------------------------------------|--|--|--|--|--|--|--|--|--|--|--|--|
| Pooled or summary result (overall rating) |  |  |  |  |  |  |  |  |  |  |  |  |
|-------------------------------------------|--|--|--|--|--|--|--|--|--|--|--|--|

Table 4 - Summary of findings overview 1

| PROM | Content validity         |                   |                                                                    |
|------|--------------------------|-------------------|--------------------------------------------------------------------|
|      | Summary or pooled result | Overall rating    | Quality of evidence - GRADE rating<br>(High/moderate/low/very low) |
|      |                          | e.g. Sufficient   | e.g. Moderate                                                      |
|      |                          | e.g. Insufficient | e.g. Low (downgraded for indirectness)                             |

Table 5 – Summary of findings overview 2

| PROM | Structural validity      |                |                                    | Internal consistency     |                |                                    | Cross-cultural validity/measurement invariance |                |                                    |
|------|--------------------------|----------------|------------------------------------|--------------------------|----------------|------------------------------------|------------------------------------------------|----------------|------------------------------------|
|      | Summary or pooled result | Overall rating | Quality of evidence (GRADE rating) | Summary or pooled result | Overall rating | Quality of evidence (GRADE rating) | Summary or pooled result                       | Overall rating | Quality of evidence (GRADE rating) |
|      |                          |                |                                    |                          |                |                                    |                                                |                |                                    |

Table 5 – Summary of findings overview 3

| PROM | Measurement error | Hypotheses testing | Responsiveness |
|------|-------------------|--------------------|----------------|
|------|-------------------|--------------------|----------------|

|  | Summary or pooled result | Overall rating | Quality of evidence (GRADE rating) | Summary or pooled result | Overall rating | Quality of evidence (GRADE rating) | Summary or pooled result | Overall rating | Quality of evidence (GRADE rating) |
|--|--------------------------|----------------|------------------------------------|--------------------------|----------------|------------------------------------|--------------------------|----------------|------------------------------------|
|  |                          |                |                                    |                          |                |                                    |                          |                |                                    |
